# Supplementary material for: Development and Validation of a Symptom-Focused Quality of Life Questionnaire (KOQUSS-40) for Gastric Cancer Patients after Gastrectomy
Source: PubMed Central journal article supplement — Cancer Res Treat. 2020 Dec 29;53(3):763–72. doi: 10.4143/crt.2020.1270 (PMC8291178; doi:10.4143/crt.2020.1270), 2020-12-29
Supplement: crt-2020-1270-suppl2.pdf [file crt-2020-1270-suppl2.pdf]

**S2 Table.** The Korean version of the KOQUSS-40 questionnaire

|                                                |                          |                          |                          |                          |
|------------------------------------------------|--------------------------|--------------------------|--------------------------|--------------------------|
| * 아래 문항은 수술 후 건강과 삶의 질, 그리고 치료 만족도에 관한 질문입니다.  | 매우                       | 약간                       | 약간                       | 매우                       |
| 지난 일주일간 상태를 떠올리며 각 질문에 적절한 답을 찾아 V 표시를 해 주십시오. | 만족                       | 만족                       | 불만                       | 불만                       |
| 1. 전반적인 건강 상태는 어떠합니까?                          | <input type="checkbox"/> | <input type="checkbox"/> | <input type="checkbox"/> | <input type="checkbox"/> |
| 2. 전반적인 삶의 질은 어떠합니까?                           | <input type="checkbox"/> | <input type="checkbox"/> | <input type="checkbox"/> | <input type="checkbox"/> |
| 3. 암 치료에 만족하십니까?                               | <input type="checkbox"/> | <input type="checkbox"/> | <input type="checkbox"/> | <input type="checkbox"/> |
| 4. 수술 상처가 만족스럽습니까?                             | <input type="checkbox"/> | <input type="checkbox"/> | <input type="checkbox"/> | <input type="checkbox"/> |
| 5. 위암 치료 비용에 만족하십니까?                           | <input type="checkbox"/> | <input type="checkbox"/> | <input type="checkbox"/> | <input type="checkbox"/> |
| * 아래 문항은 수술 후 경험할 수 있는 증상들에 관한 질문입니다.          | 전혀                       | 약간                       | 꽤                        | 매우                       |
| 지난 일주일간 상태를 떠올리며 각 질문에 적절한 답을 찾아 V 표시를 해 주십시오. | 아니다                      | 그렇다                      | 그렇다                      | 그렇다                      |
| 6. 식사 속도가 느려서 사회생활이 불편하십니까?                    | <input type="checkbox"/> | <input type="checkbox"/> | <input type="checkbox"/> | <input type="checkbox"/> |
| 7. 음식을 자주 먹게 되어 일상생활이 불편하십니까?                  | <input type="checkbox"/> | <input type="checkbox"/> | <input type="checkbox"/> | <input type="checkbox"/> |
| 8. 기운이 없어서 일상생활이 불편하십니까?                       | <input type="checkbox"/> | <input type="checkbox"/> | <input type="checkbox"/> | <input type="checkbox"/> |
| 9. 수술 전과 비교해서 식사량이 줄었습니까?                      | <input type="checkbox"/> | <input type="checkbox"/> | <input type="checkbox"/> | <input type="checkbox"/> |
| 10. 식욕이 줄었습니까?                                 | <input type="checkbox"/> | <input type="checkbox"/> | <input type="checkbox"/> | <input type="checkbox"/> |
| 11. 조금만 먹어도 배가 부르십니까?                          | <input type="checkbox"/> | <input type="checkbox"/> | <input type="checkbox"/> | <input type="checkbox"/> |
| 12. 밥을 먹을 때 목에 걸리는 느낌이 있습니까?                   | <input type="checkbox"/> | <input type="checkbox"/> | <input type="checkbox"/> | <input type="checkbox"/> |
| 13. 물을 마실 때 목에 걸리는 느낌이 있습니까?                   | <input type="checkbox"/> | <input type="checkbox"/> | <input type="checkbox"/> | <input type="checkbox"/> |

---

|                                |                          |                          |                          |                          |
|--------------------------------|--------------------------|--------------------------|--------------------------|--------------------------|
| 14. 식사 후 명치가 아프십니까?            | <input type="checkbox"/> | <input type="checkbox"/> | <input type="checkbox"/> | <input type="checkbox"/> |
| 15. 음식물이 역류하는 느낌이 있습니까?        | <input type="checkbox"/> | <input type="checkbox"/> | <input type="checkbox"/> | <input type="checkbox"/> |
| 16. 쓴 물이 올라오니까?                | <input type="checkbox"/> | <input type="checkbox"/> | <input type="checkbox"/> | <input type="checkbox"/> |
| 17. 가슴이 타는 듯한 느낌이 있습니까?        | <input type="checkbox"/> | <input type="checkbox"/> | <input type="checkbox"/> | <input type="checkbox"/> |
| 18. 식사 후 배가 아픈 적이 있습니까?        | <input type="checkbox"/> | <input type="checkbox"/> | <input type="checkbox"/> | <input type="checkbox"/> |
| 19. 식사 후 가슴이 두근거린 적이 있습니까?     | <input type="checkbox"/> | <input type="checkbox"/> | <input type="checkbox"/> | <input type="checkbox"/> |
| 20. 식사 후 얼굴이 달아오른 적이 있습니까?     | <input type="checkbox"/> | <input type="checkbox"/> | <input type="checkbox"/> | <input type="checkbox"/> |
| 21. 식사 후 얼굴이 창백해진 적이 있습니까?     | <input type="checkbox"/> | <input type="checkbox"/> | <input type="checkbox"/> | <input type="checkbox"/> |
| 22. 갑자기 식은 땀이 난 적이 있습니까?       | <input type="checkbox"/> | <input type="checkbox"/> | <input type="checkbox"/> | <input type="checkbox"/> |
| 23. 식사 후 설사한 적이 있습니까?          | <input type="checkbox"/> | <input type="checkbox"/> | <input type="checkbox"/> | <input type="checkbox"/> |
| 24. 식사와 관련 없이 배가 아픈 적이 있습니까?   | <input type="checkbox"/> | <input type="checkbox"/> | <input type="checkbox"/> | <input type="checkbox"/> |
| 25. 배가 부글거려 불편하십니까?            | <input type="checkbox"/> | <input type="checkbox"/> | <input type="checkbox"/> | <input type="checkbox"/> |
| 26. 잦은 대변으로 불편하십니까?            | <input type="checkbox"/> | <input type="checkbox"/> | <input type="checkbox"/> | <input type="checkbox"/> |
| 27. 잦은 방귀로 불편하십니까?             | <input type="checkbox"/> | <input type="checkbox"/> | <input type="checkbox"/> | <input type="checkbox"/> |
| 28. 변비로 불편하십니까?                | <input type="checkbox"/> | <input type="checkbox"/> | <input type="checkbox"/> | <input type="checkbox"/> |
| 29. 대변이 딱딱하십니까?                | <input type="checkbox"/> | <input type="checkbox"/> | <input type="checkbox"/> | <input type="checkbox"/> |
| 30. 초조하신 적이 있습니까?              | <input type="checkbox"/> | <input type="checkbox"/> | <input type="checkbox"/> | <input type="checkbox"/> |
| 31. 우울하신 적이 있습니까?              | <input type="checkbox"/> | <input type="checkbox"/> | <input type="checkbox"/> | <input type="checkbox"/> |
| 32. 무기력감을 느낀 적이 있습니까?          | <input type="checkbox"/> | <input type="checkbox"/> | <input type="checkbox"/> | <input type="checkbox"/> |
| 33. 불면증이 있습니까?                 | <input type="checkbox"/> | <input type="checkbox"/> | <input type="checkbox"/> | <input type="checkbox"/> |
| 34. 갑자기 어지럽고 주저 앉고 싶은 적이 있습니까? | <input type="checkbox"/> | <input type="checkbox"/> | <input type="checkbox"/> | <input type="checkbox"/> |

---

---

|                                        |                          |                          |                          |                          |
|----------------------------------------|--------------------------|--------------------------|--------------------------|--------------------------|
| 35. 몸무게가 줄어 걱정이 되십니까?                  | <input type="checkbox"/> | <input type="checkbox"/> | <input type="checkbox"/> | <input type="checkbox"/> |
| 36. 수술 상처 때문에 목욕탕이나 수영장에 가는 것이 꺼려지십니까? | <input type="checkbox"/> | <input type="checkbox"/> | <input type="checkbox"/> | <input type="checkbox"/> |
| 37. 위암이 재발할까 걱정되십니까?                   | <input type="checkbox"/> | <input type="checkbox"/> | <input type="checkbox"/> | <input type="checkbox"/> |
| 38. 수술 상처에 통증이 있으십니까?                  | <input type="checkbox"/> | <input type="checkbox"/> | <input type="checkbox"/> | <input type="checkbox"/> |
| 39. 수술 상처가 가려우십니까?                     | <input type="checkbox"/> | <input type="checkbox"/> | <input type="checkbox"/> | <input type="checkbox"/> |
| 40. 위암 치료비로 경제적 어려움을 겪고 있습니까?          | <input type="checkbox"/> | <input type="checkbox"/> | <input type="checkbox"/> | <input type="checkbox"/> |

---
