# Supplementary material for: Development and Validation of a Symptom-Focused Quality of Life Questionnaire (KOQUSS-40) for Gastric Cancer Patients after Gastrectomy
Source: PubMed Central journal article supplement — Cancer Res Treat. 2020 Dec 29;53(3):763–72. doi: 10.4143/crt.2020.1270 (PMC8291178; doi:10.4143/crt.2020.1270), 2020-12-29
Supplement: crt-2020-1270-suppl3.pdf [file crt-2020-1270-suppl3.pdf]

**S3 Table.** Item analysis

| Item | No. | Minimum score | Maximum score | Mean | Standard deviation | Skewness | Standard error | Kurtosis | Standard error |
|------|-----|---------------|---------------|------|--------------------|----------|----------------|----------|----------------|
| 1    | 413 | 1             | 4             | 1.67 | 0.667              | 0.639    | 0.12           | -0.004   | 0.24           |
| 2    | 413 | 1             | 4             | 1.8  | 0.726              | 0.547    | 0.12           | -0.17    | 0.24           |
| 3    | 413 | 1             | 4             | 1.27 | 0.517              | 1.946    | 0.12           | 4.176    | 0.24           |
| 4    | 413 | 1             | 4             | 1.42 | 0.662              | 1.652    | 0.12           | 2.727    | 0.24           |
| 5    | 413 | 1             | 4             | 1.39 | 0.572              | 1.203    | 0.12           | 0.888    | 0.24           |
| 6    | 413 | 1             | 4             | 1.75 | 0.738              | 0.807    | 0.12           | 0.446    | 0.24           |
| 7    | 413 | 1             | 4             | 1.73 | 0.737              | 0.843    | 0.12           | 0.514    | 0.24           |
| 8    | 413 | 1             | 4             | 1.78 | 0.792              | 0.88     | 0.12           | 0.432    | 0.24           |
| 9    | 413 | 1             | 4             | 2.4  | 0.951              | 0.306    | 0.12           | -0.823   | 0.24           |
| 10   | 413 | 1             | 4             | 1.85 | 0.917              | 0.92     | 0.12           | 0.014    | 0.24           |
| 11   | 413 | 1             | 4             | 2.09 | 0.834              | 0.591    | 0.12           | -0.036   | 0.24           |
| 12   | 413 | 1             | 4             | 1.41 | 0.682              | 1.817    | 0.12           | 3.236    | 0.24           |
| 13   | 413 | 1             | 4             | 1.38 | 0.664              | 1.939    | 0.12           | 3.902    | 0.24           |
| 14   | 413 | 1             | 4             | 1.4  | 0.637              | 1.673    | 0.12           | 2.95     | 0.24           |
| 15   | 413 | 1             | 4             | 1.57 | 0.716              | 1.178    | 0.12           | 1.092    | 0.24           |
| 16   | 413 | 1             | 4             | 1.42 | 0.681              | 1.648    | 0.12           | 2.454    | 0.24           |
| 17   | 413 | 1             | 4             | 1.2  | 0.505              | 2.819    | 0.12           | 8.768    | 0.24           |
| 18   | 413 | 1             | 4             | 1.68 | 0.685              | 0.775    | 0.12           | 0.506    | 0.24           |
| 19   | 413 | 1             | 4             | 1.27 | 0.518              | 2.132    | 0.12           | 5.475    | 0.24           |
| 20   | 413 | 1             | 4             | 1.22 | 0.474              | 2.373    | 0.12           | 6.709    | 0.24           |
| 21   | 413 | 1             | 4             | 1.19 | 0.44               | 2.407    | 0.12           | 6.439    | 0.24           |
| 22   | 413 | 1             | 4             | 1.52 | 0.648              | 1.124    | 0.12           | 1.289    | 0.24           |
| 23   | 413 | 1             | 4             | 1.79 | 0.725              | 0.766    | 0.12           | 0.624    | 0.24           |
| 24   | 413 | 1             | 4             | 1.37 | 0.54               | 1.192    | 0.12           | 0.972    | 0.24           |
| 25   | 413 | 1             | 4             | 1.71 | 0.739              | 0.915    | 0.12           | 0.707    | 0.24           |
| 26   | 413 | 1             | 4             | 1.4  | 0.64               | 1.589    | 0.12           | 2.202    | 0.24           |
| 27   | 413 | 1             | 4             | 1.84 | 0.867              | 0.899    | 0.12           | 0.199    | 0.24           |
| 28   | 413 | 1             | 4             | 1.35 | 0.604              | 1.853    | 0.12           | 3.754    | 0.24           |
| 29   | 413 | 1             | 4             | 1.37 | 0.605              | 1.657    | 0.12           | 2.85     | 0.24           |
| 30   | 413 | 1             | 4             | 1.51 | 0.681              | 1.358    | 0.12           | 1.914    | 0.24           |
| 31   | 413 | 1             | 4             | 1.57 | 0.689              | 1.17     | 0.12           | 1.421    | 0.24           |
| 32   | 413 | 1             | 4             | 1.62 | 0.668              | 0.973    | 0.12           | 1.18     | 0.24           |
| 33   | 413 | 1             | 4             | 1.54 | 0.751              | 1.522    | 0.12           | 2.276    | 0.24           |
| 34   | 413 | 1             | 4             | 1.55 | 0.654              | 1.045    | 0.12           | 1.075    | 0.24           |
| 35   | 413 | 1             | 4             | 1.62 | 0.811              | 1.314    | 0.12           | 1.255    | 0.24           |
| 36   | 413 | 1             | 4             | 1.35 | 0.704              | 2.269    | 0.12           | 4.991    | 0.24           |
| 37   | 413 | 1             | 4             | 2.18 | 0.894              | 0.638    | 0.12           | -0.211   | 0.24           |
| 38   | 413 | 1             | 3             | 1.17 | 0.416              | 2.312    | 0.12           | 4.746    | 0.24           |
| 39   | 413 | 1             | 4             | 1.25 | 0.507              | 2.126    | 0.12           | 5.035    | 0.24           |
| 40   | 413 | 1             | 4             | 1.4  | 0.674              | 1.996    | 0.12           | 4.421    | 0.24           |
